# Supplementary material for: FABP6 Expression Correlates with Immune Infiltration and Immunogenicity in Colorectal Cancer Cells
Source: Hindawi journal article supplement (doi:10.1155/2022/3129765), 2022-08-17

**A**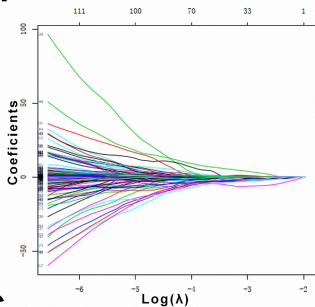**B**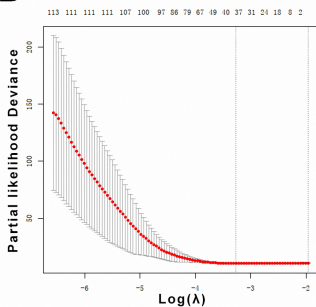**C**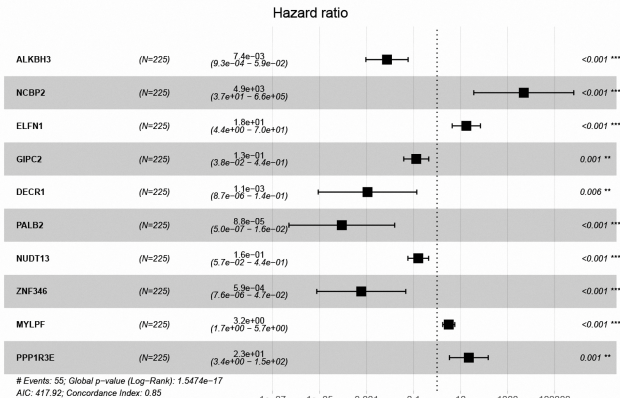

Supplement: f7 [file 3129765.f7.pdf]
