# Supplementary material for: FABP6 Expression Correlates with Immune Infiltration and Immunogenicity in Colorectal Cancer Cells
Source: Hindawi journal article supplement (doi:10.1155/2022/3129765), 2022-08-17

A

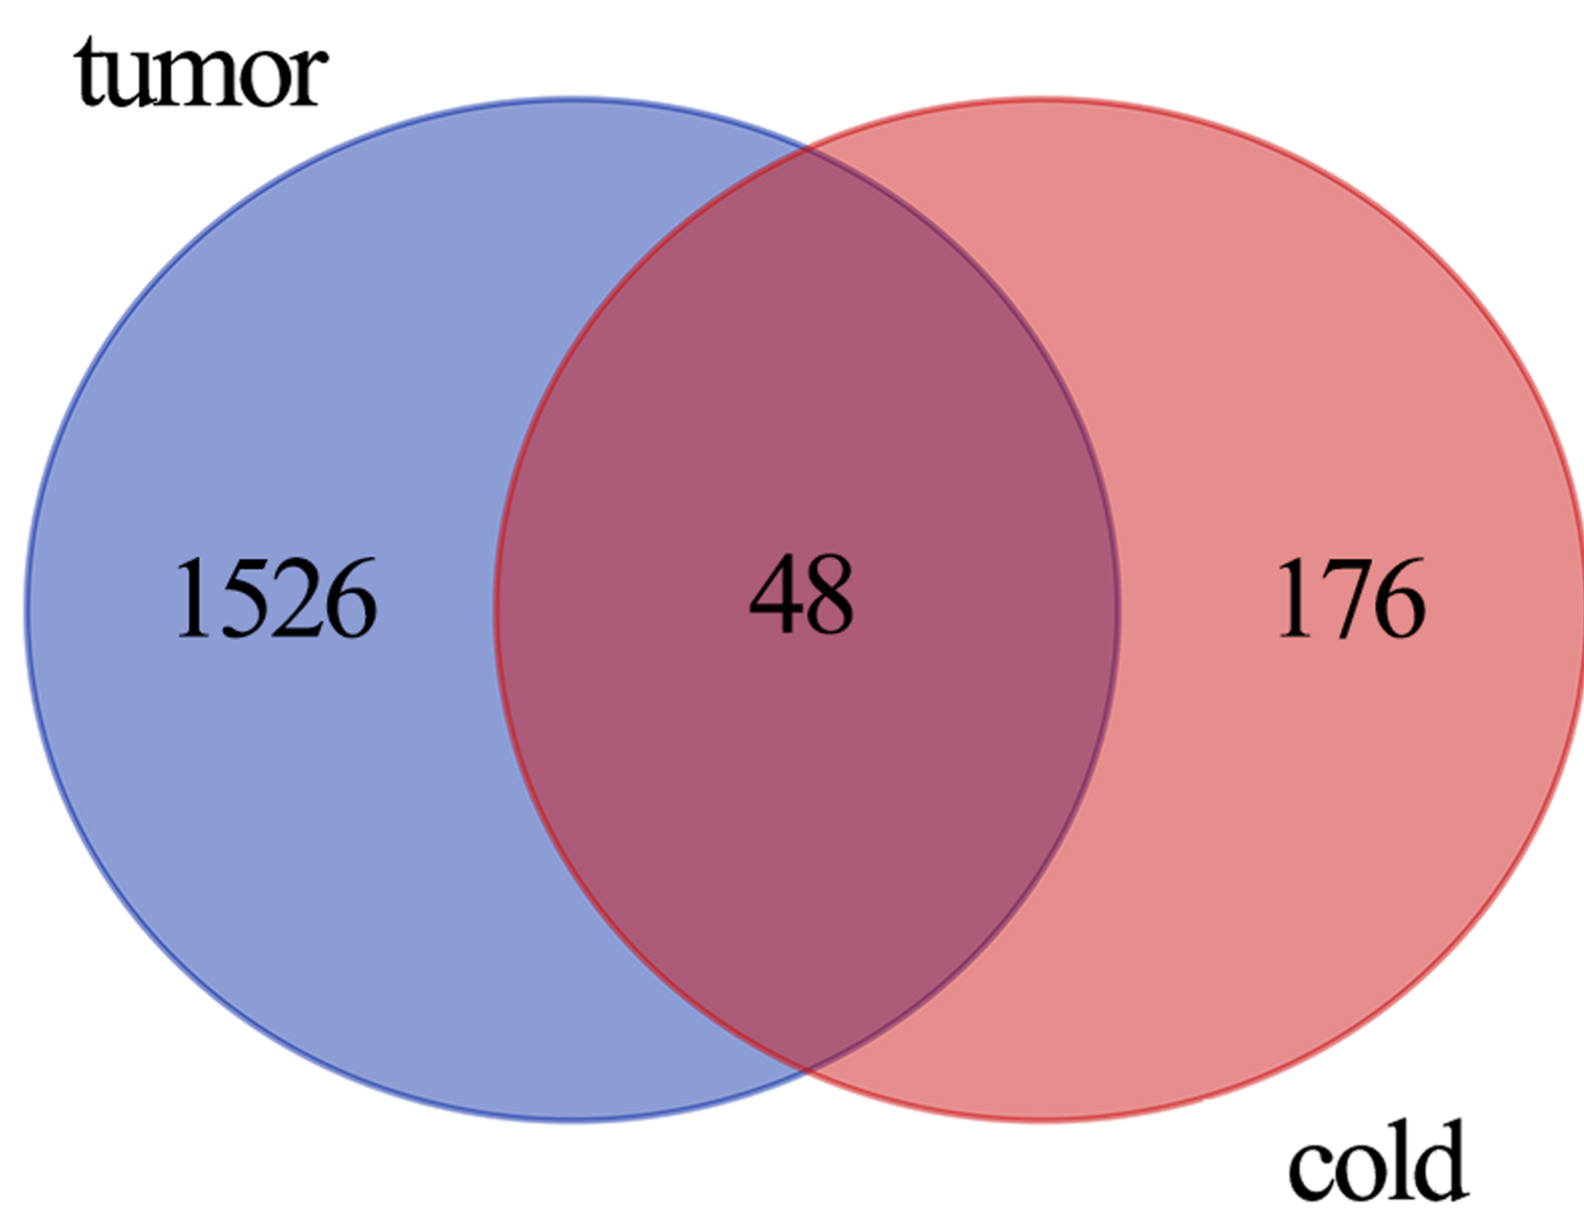

B

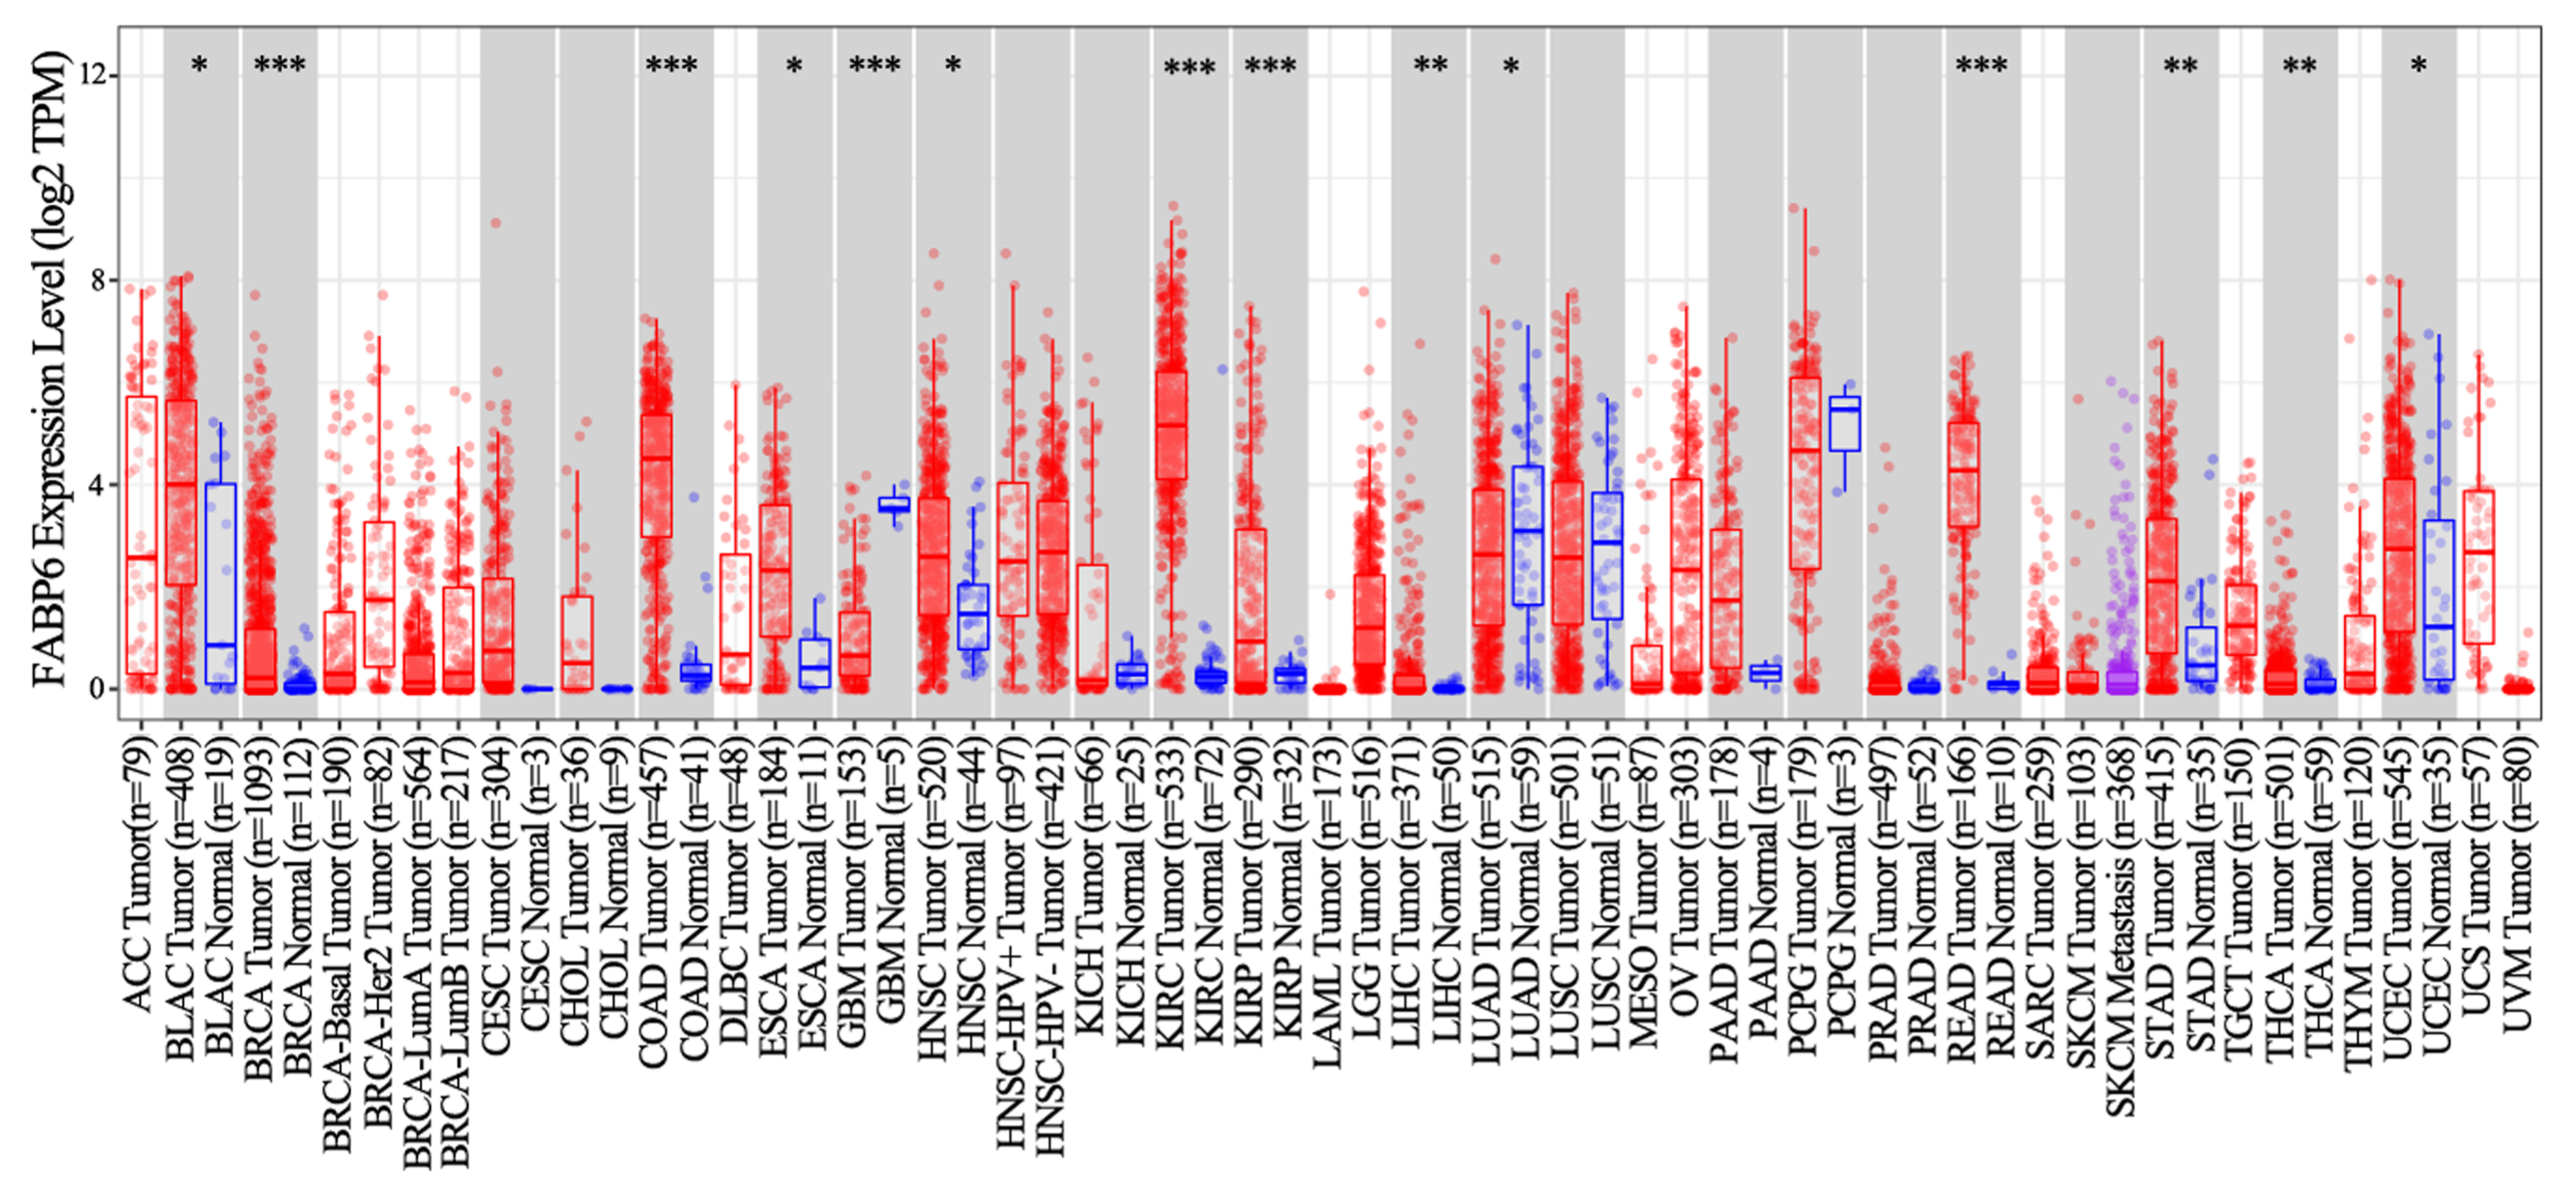

C

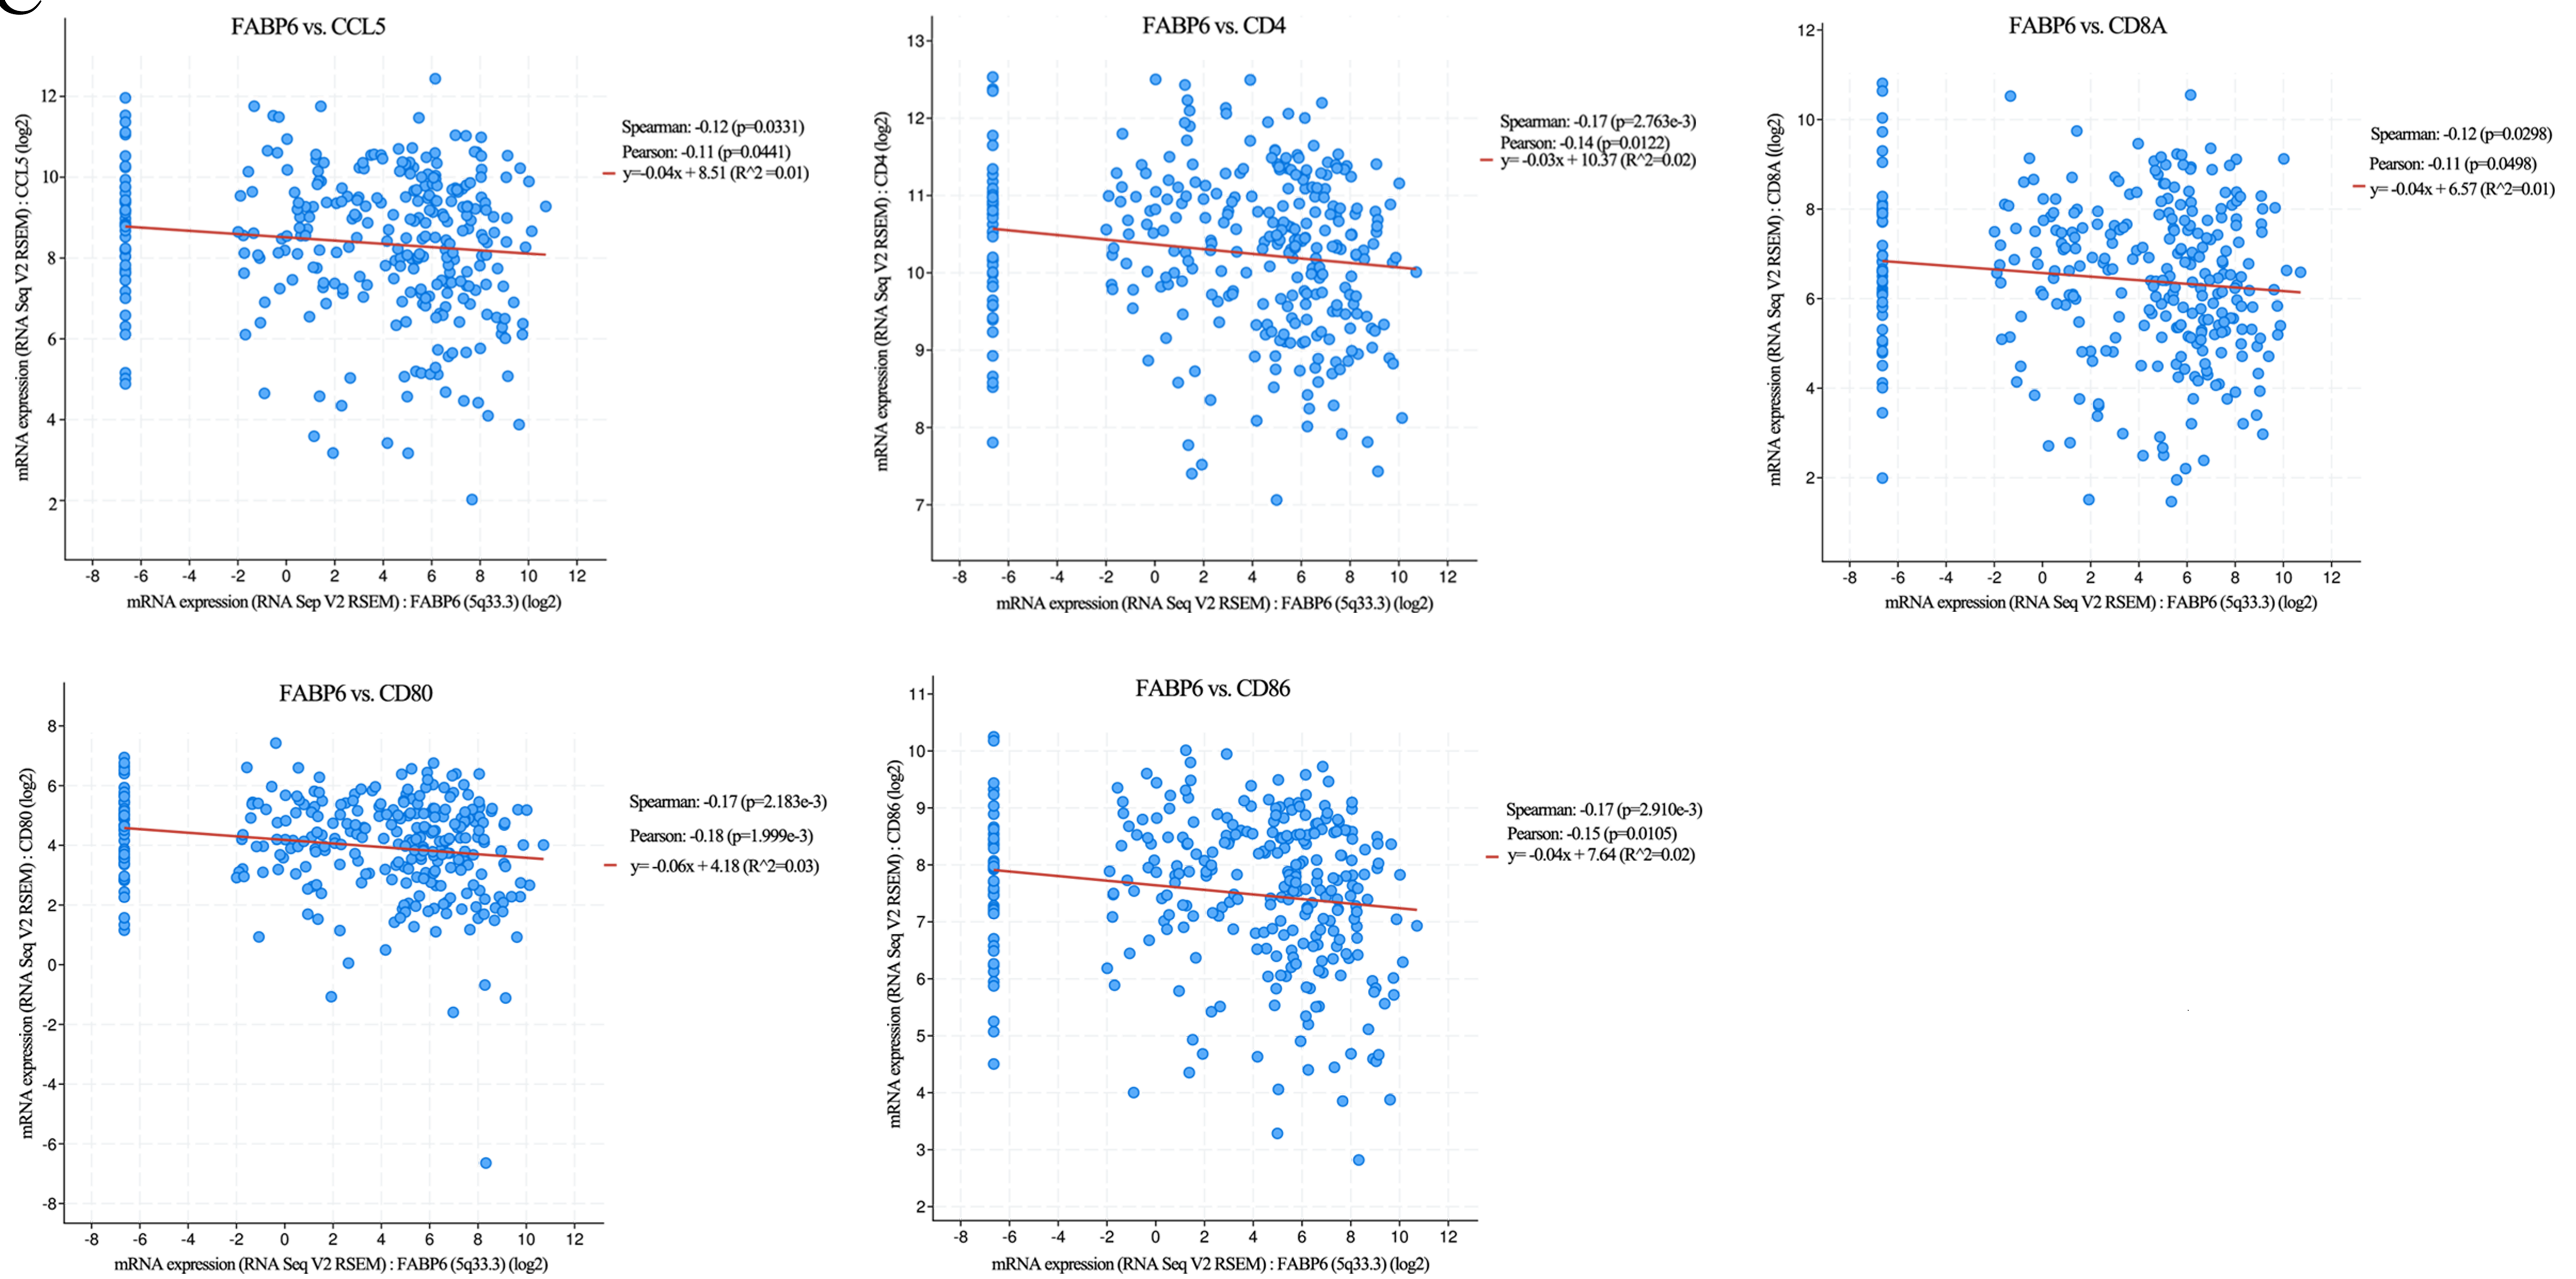

D

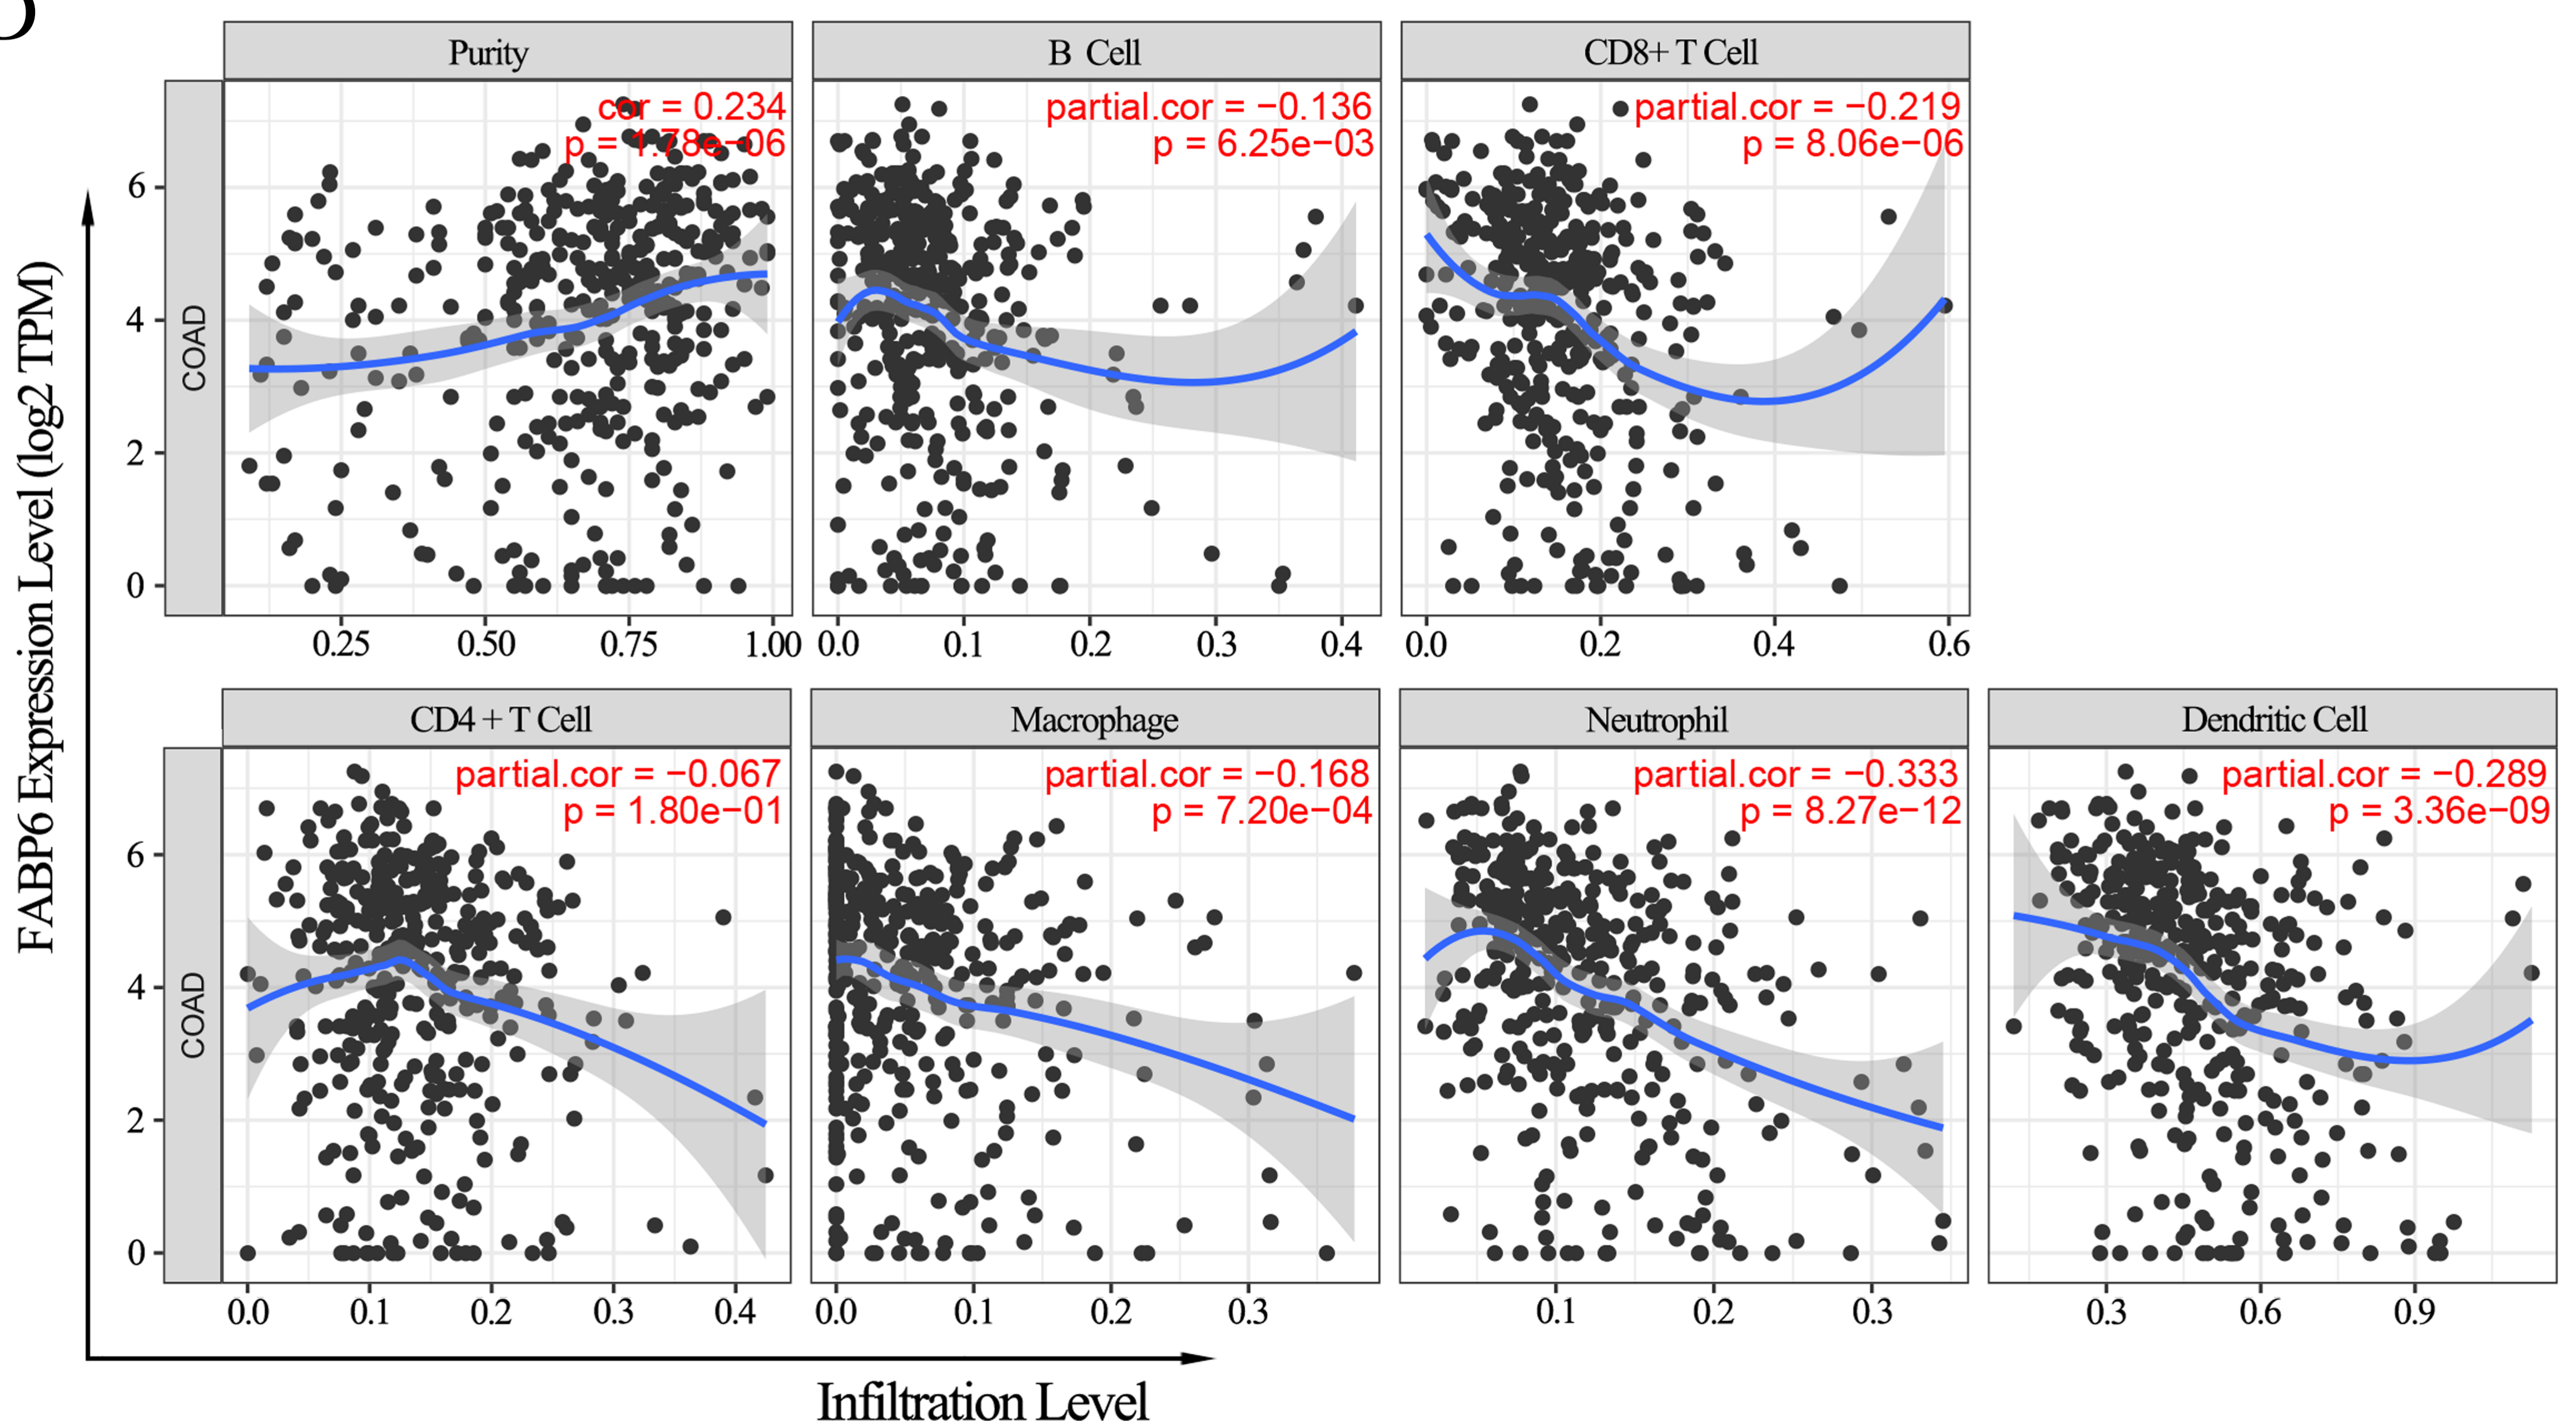

Supplement: f8 [file 3129765.f8.pdf]
