# Supplementary material for: FABP6 Expression Correlates with Immune Infiltration and Immunogenicity in Colorectal Cancer Cells
Source: Hindawi journal article supplement (doi:10.1155/2022/3129765), 2022-08-17
Supplement: f10 [file 3129765.f10.pdf]

**A**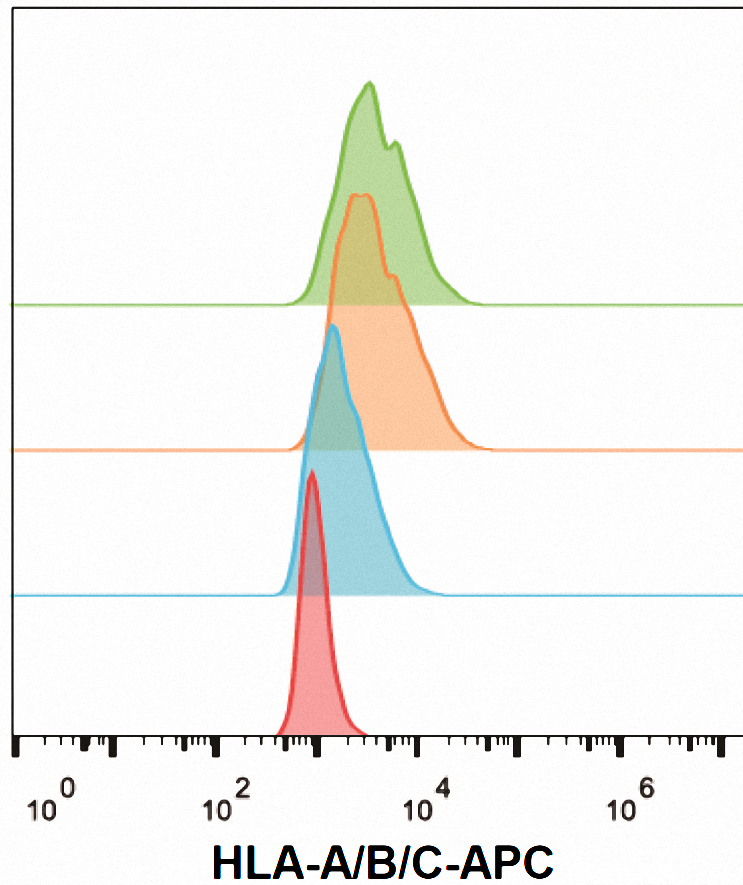**HCT116****B**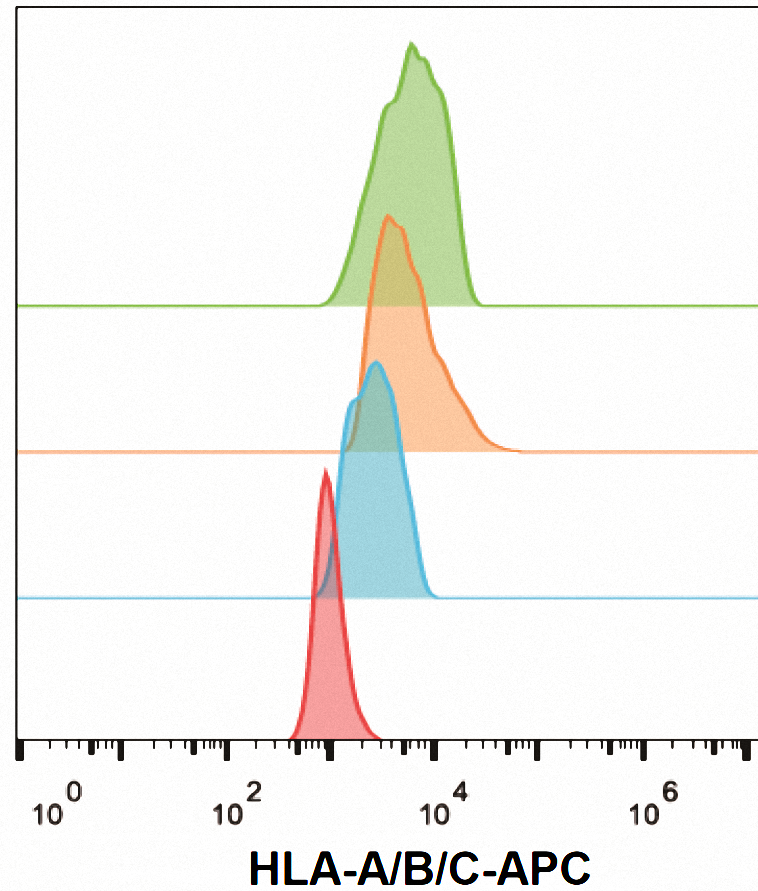**SW1116**
