# Supplementary material for: FABP6 Expression Correlates with Immune Infiltration and Immunogenicity in Colorectal Cancer Cells
Source: Hindawi journal article supplement (doi:10.1155/2022/3129765), 2022-08-17
Supplement: f11 [file 3129765.f11.pdf]

**Supplementary Table 1: Primers used in this study.**

| Gene   | Forward               | Reverse                |
|--------|-----------------------|------------------------|
| FABP6  | ACCGGCAAGTTCGAGATGG   | CCTTTTCGATTACATCGCTGGA |
| CCL4   | CTGTGCTGATCCCAGTGAATC | TCAGTTCAGTTCAGGTCATACA |
| CCL5   | CCAGCAGTCGTCTTTGTCAC  | CTCTGGGTTGGCACACACTT   |
| CXCL9  | CCAGTAGTGAGAAAGGGTCGC | AGGGCTTGGGGCAAATTGTT   |
| CXCL10 | GTGGCATTCAAGGAGTACCTC | TGATGGCCTTCGATTCTGGATT |
| HLA-A  | ACCCTCGTCCTGCTACTCTC  | CTGTCTCCTCGTCCCAATACT  |
| HLA-B  | CAGTTCGTGAGGTTTCGACAG | CAGCCGTACATGCTCTGGA    |
| HLA-C  | CCATGAGGTATTTGTGGACCG | TCTCGGACTCTCGTCGTCG    |
| B2M    | GAGGCTATCCAGCGTACTCCA | CGGCAGGCATACTCATCTTTT  |
| TAP1   | TGCCCCGCATATTCTCCCT   | CACCTGCGTTTTTCGCTCTTG  |
| TAP2   | TGGACGCGGCTTTACTGTG   | GCAGCCCTCTTAGCTTTAGCA  |
